# Supplementary material for: Structural insight into microtubule stabilization and kinesin inhibition by Tau family MAPs
Source: PubMed Central journal article supplement — J Cell Biol. 2018 Dec 3;217(12):4155–63. doi: 10.1083/jcb.201711182 (PMC6279373; doi:10.1083/jcb.201711182), 2018-12-03
Supplement: JCB_201711182_sm.pdf [file JCB_201711182_sm.pdf]

## Supplemental material

Shigematsu et al., <https://doi.org/10.1083/jcb.201711182>

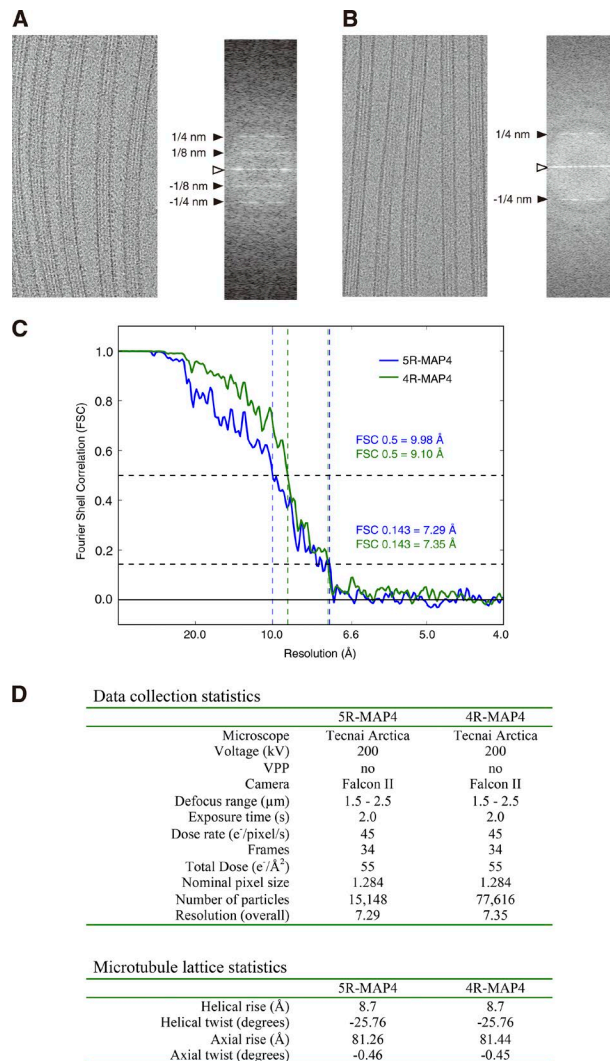

Figure S1. **Resolution and statistics for the cryo-EM reconstructions; related to Fig. 2.** (A) Example micrograph of 4R-MAP4–kinesin-1–microtubule complex (left). Fast Fourier transform of the micrograph is also shown (right). (B) Example micrograph of 4R-MAP4–microtubule complex (left). Fast Fourier transform of the micrograph is also shown (right). (C) Fourier shell correlation curves of the MAP4–kinesin-1–microtubule complexes. (D) Data collection and processing statistics and helical parameters for the reconstructions. VPP, Volta phase plate.

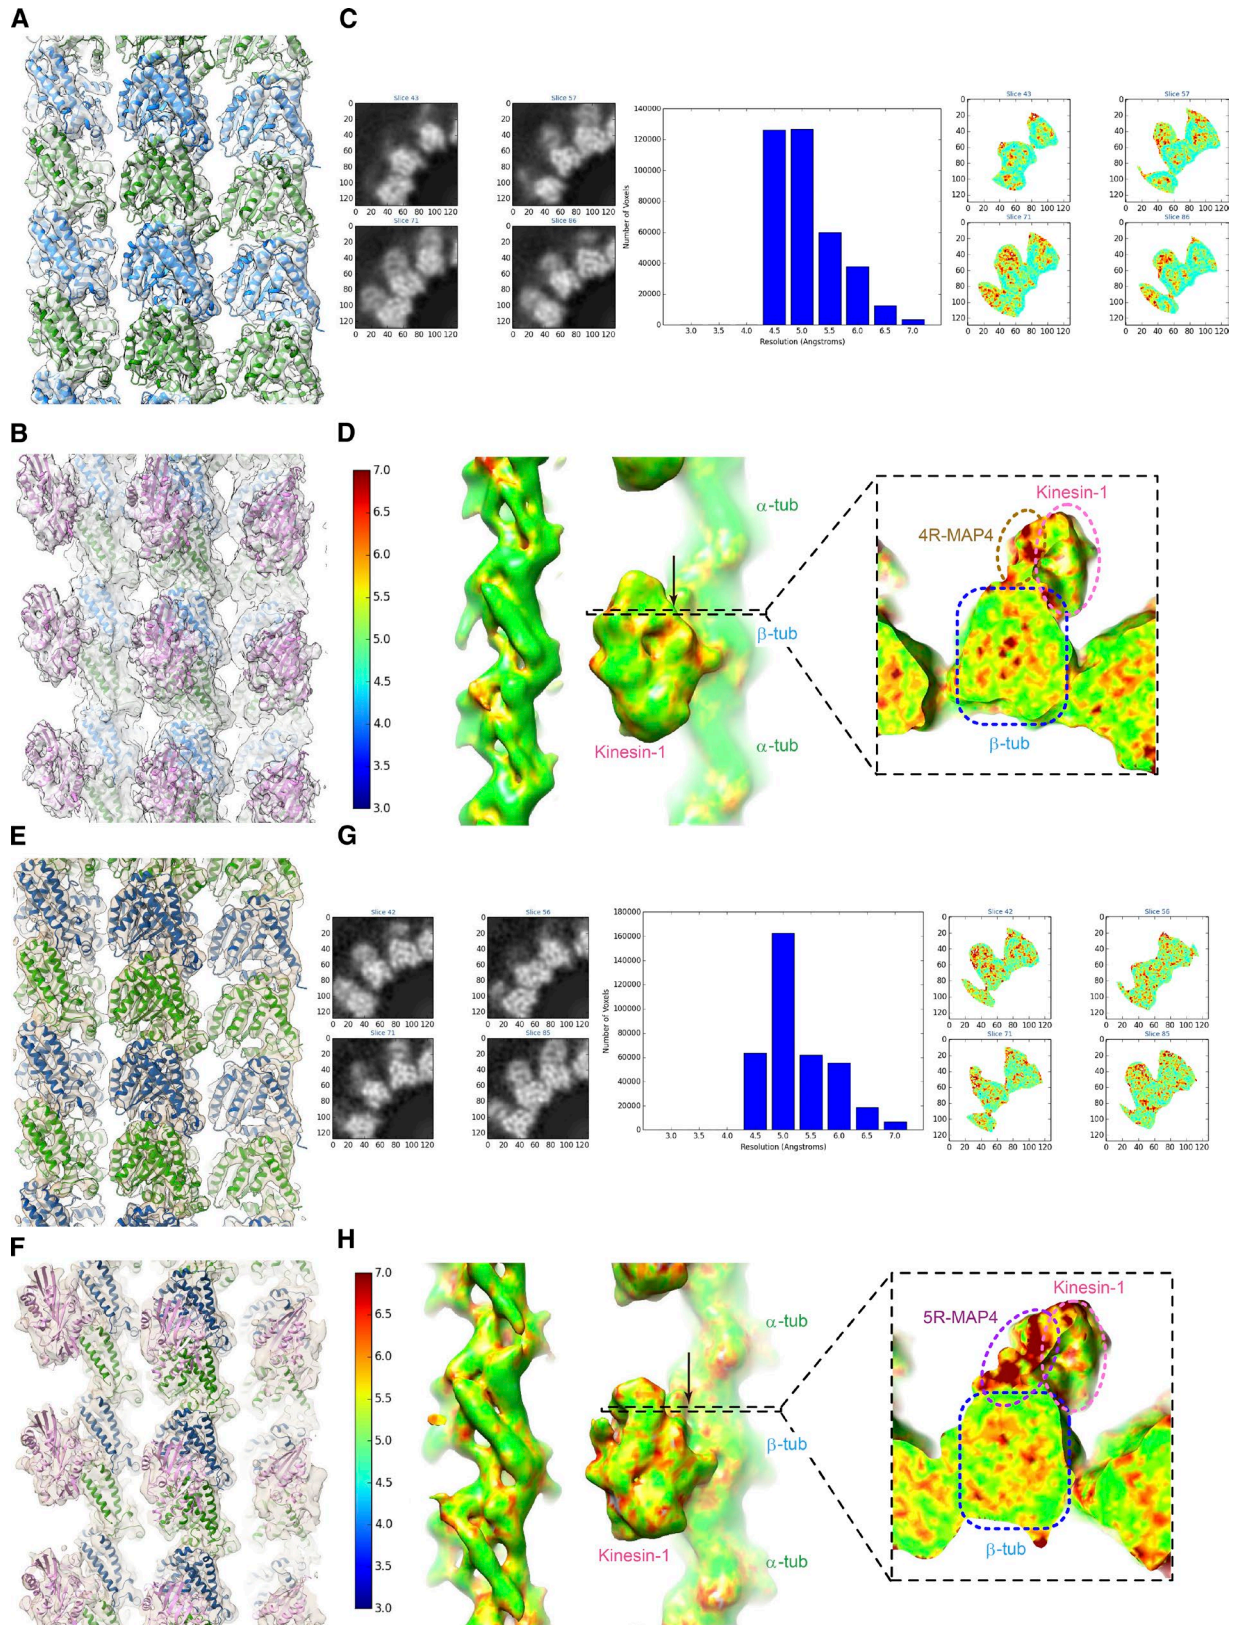

Figure S2. **Local resolution estimates; related to Fig. 2. (A and B)** The density maps and the docked atomic models of the 4R-MAP4–kinesin-1–microtubule complex. **(C and D)** Local resolution estimates of 4R-MAP4–kinesin-1–microtubule complex calculated by ResMap. Inset in D shows the horizontal slice observed from the plus end indicated by the arrow in the middle panel. **(E and F)** The density maps and the docked atomic models of the 5R-MAP4–kinesin-1–microtubule complex. **(G and H)** Local resolution estimates of 5R-MAP4–kinesin-1–microtubule complex calculated by ResMap. Inset in H shows the horizontal slice observed from the plus end indicated by the arrow in the middle panel.



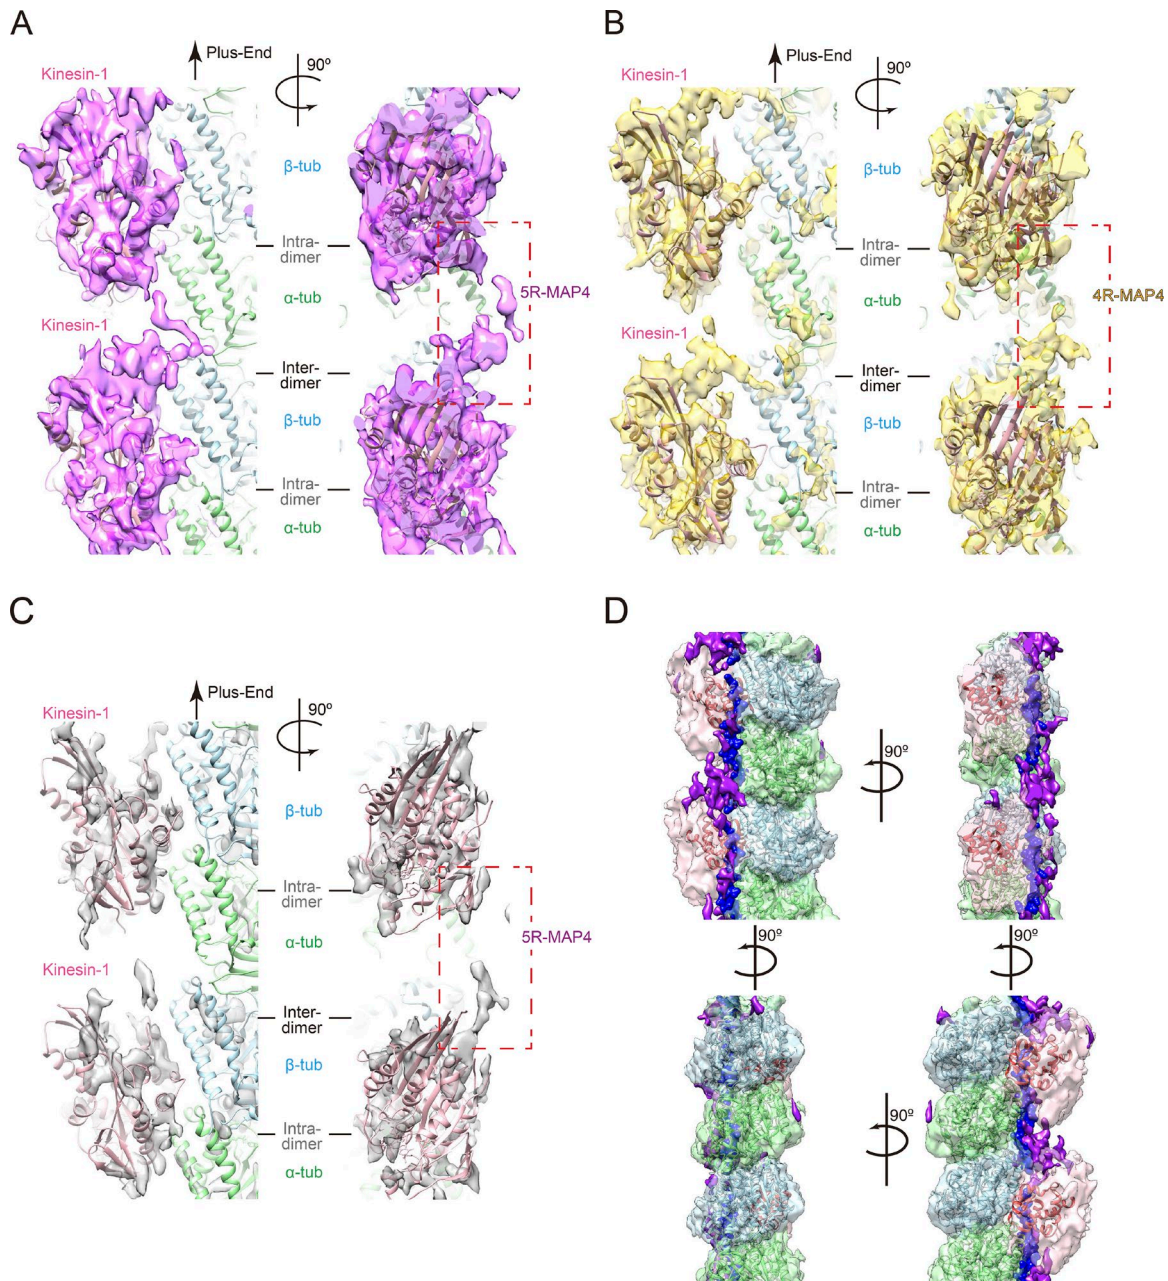

Figure S3. **Dynein does not compete at the microtubule binding site with Tau family MAPs; related to Fig. 3.** (A–C) Difference maps between 5R-MAP4–kinesin-1–microtubule complex and kinesin-1–microtubule complex (A), between 4R-MAP4–kinesin-1–microtubule complex and kinesin-1–microtubule complex (B), and between 5R-MAP4–kinesin-1–microtubule complex and 4R-MAP4–kinesin-1–microtubule complex (C) generated by UCSF Chimera. The occupancy and/or stability of kinesin-1 were different among these three maps so that the densities corresponding with MAP4 as well as kinesin-1 appeared. (D) Cryo-EM reconstruction of 5R-MAP4–kinesin-1–microtubule complex shown with the microtubule binding domain (MTBD) of dynein (red ribbon) and Tau (blue surface). Green,  $\alpha$ -tubulin; light blue,  $\beta$ -tubulin; pink, kinesin-1; purple, 5R-MAP4. In contrast with kinesin-1, MTBD of dynein does not collide with 5R-MAP4 or Tau.
